# Supplementary material
Source: publisher figshare collection journal article supplement (https://acs.figshare.com/ndownloader/files/17597930)
Supplement: Supplementary file 1 [file 17597930]

# Supporting Information

## Cs-doped TiO<sub>2</sub> Nanorod Array Enhances Electron Injection and Transport in Carbon-Based CsPbI<sub>3</sub> Perovskite Solar Cells

*Jiaming Liu<sup>†</sup>, Liqun Zhu<sup>†</sup>, Sisi Xiang<sup>†</sup>, Hailiang Wang<sup>†</sup>, Huicong Liu<sup>†</sup>, Weiping Li<sup>†</sup>,  
and Haining Chen<sup>†\*</sup>*

*<sup>†</sup> School of Materials Science and Engineering, Beihang University, No. 37 Xueyuan Road, Haidian District, Beijing 100191, People's Republic of China.*

*\* Corresponding E-mail: [chenhaining@buaa.edu.cn](mailto:chenhaining@buaa.edu.cn) (Haining Chen)*

Number of pages: 14

Number of Figures: 9

Number of Tables: 2

## Materials

The  $\text{CsNO}_3$  (99.99%), IPA (99.5%), and DMF (anhydrous, 99.8%) were purchased from Alfa Aesar. The CsI (99.9%), HI (57 wt.% in  $\text{H}_2\text{O}$ ) and titanium diisopropoxide bis-(acetylacetonate) (75 wt.% in isopropanol) were purchased from Sigma-Aldrich. The  $\text{PbI}_2$  (99.9%), hydrochloric acid (37%), 1-butanol (99.5%), titanium (IV) isopropoxide (99.9%), ethanol (99.5%), and ultrasonic cleaning solution were purchased from Aladdin. The FTO glass (TEC15, NSG) and the commercial carbon paste (MTW-CE-C-003) were purchased from Shanghai MaterWin New Materials Co., Ltd. All the chemicals are used as received.

## Characterization

Surface and cross-section morphologies were performed on a Zeiss Supra 55 field emission scanning electron microscopy (FESEM). X-ray diffraction (XRD) patterns were collected with a Rigaku D/MAX-2500 X-ray diffractometer using  $\text{Cu K}\alpha$  radiation ( $\lambda = 0.1541 \text{ nm}$ ) with the speed of  $6^\circ/\text{min}$ . Chemical states and valence band spectrum of film surface were evaluated by an X-ray photoemission spectroscopy (XPS, ESCALab250Xi). Absorption spectra were measured on a UV-3600 ultraviolet and visible (UV-vis) spectrophotometer. Static contact angle of  $\text{CsPbI}_3$  precursor solution on the surface of  $\text{TiO}_2$  nanorods substrate were measured by sessile drop method with an optical contact angle meter system DSA20 (KRÜSS, Germany) at room temperature. The photoluminescence (PL) spectra were obtained on a lifetime and steady state spectrometer (FLS980, Edinburgh Instruments Ltd.)

with the excitation wavelength of 475 nm at the room temperature. The Mott–Schottky (M-S) plots were acquired using a CHI 660E electrochemical analyzer in a three-electrode system. The TiO<sub>2</sub> nanorods substrate, an Ag/AgCl electrode and a Pt wire served as the working, reference and counter electrodes, respectively. The electrolyte used for this measurement contained 0.1 M Na<sub>2</sub>SO<sub>4</sub> and the frequency was set at 5 kHz.

The J-V measurements were recorded on a Zahner photo-electrochemical workstation by the scans (a voltage step of 50 mV and a delay time of 100 ms) under the illumination of a solar simulator (Newport SOL3A 94023A, 100 mW cm<sup>-2</sup>, AM 1.5), intensity was calibrated with a certified Si-reference cell (Newport). The intensity-modulated photocurrent/photovoltage spectroscopy (IMPS/IMVS) was also performed on the Zahner photo-electrochemical workstation and the wavelength of the illumination light was 417 nm. The active area of solar cell was masked to about 6.25 mm<sup>2</sup>. IPCE spectra were recorded on an IPCE kit (E0201, Institute of Physics, Chinese Academy of Sciences). For the stability test at room temperature (20-30 °C), the devices were stored in ambient air (relative humidity~20-30%) without encapsulation.

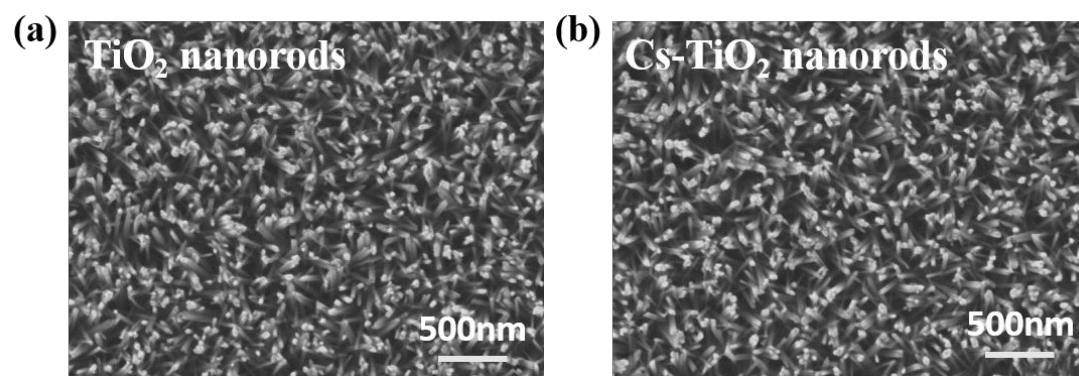

**Figure S1** Top-view SEM images of TiO<sub>2</sub> and Cs-TiO<sub>2</sub> nanorods arrays.

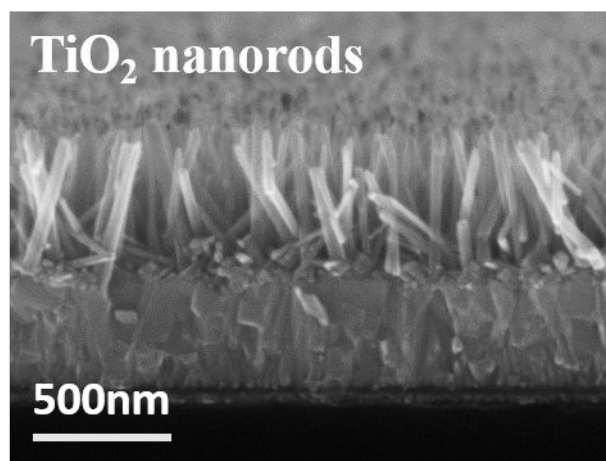

**Figure S2** Cross-sectional SEM images of pure TiO<sub>2</sub> nanorods arrays.

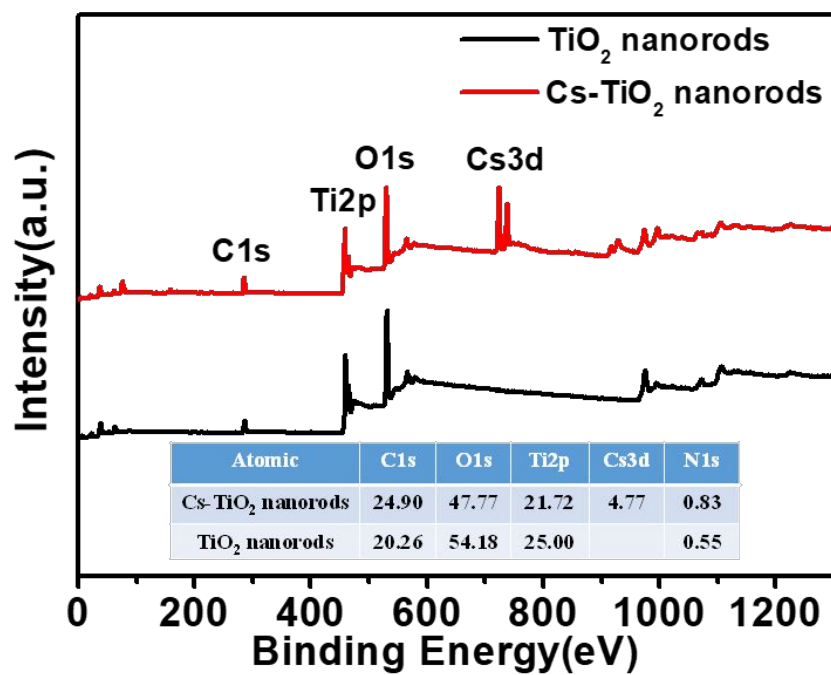

**Figure S3** Full range XPS spectra of TiO<sub>2</sub> and Cs-TiO<sub>2</sub> nanorods, inserted table shows the atomic percent obtained from the XPS survey.

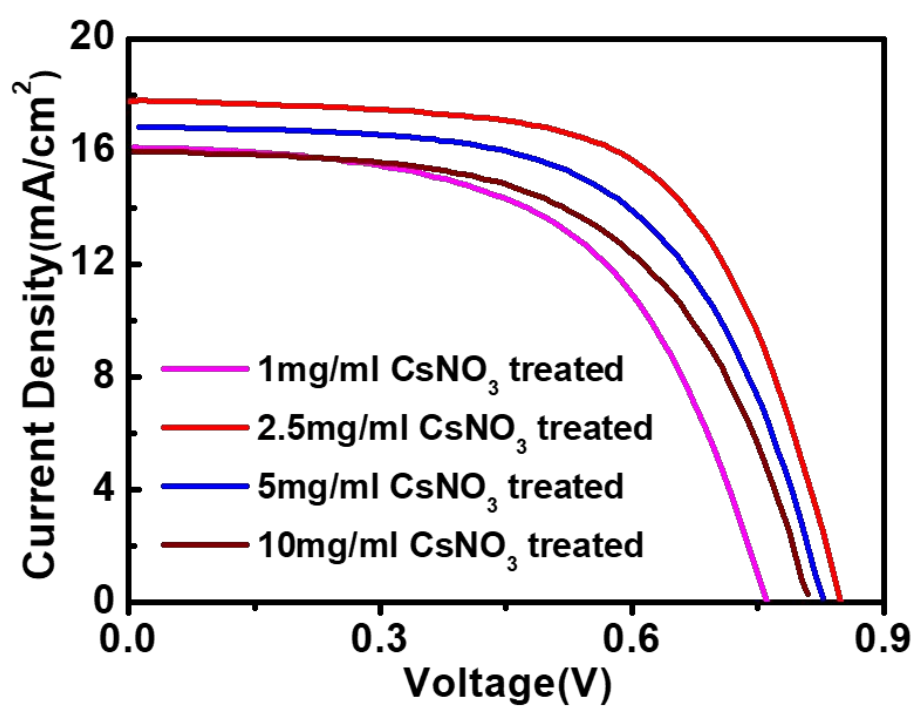

**Figure S4** J-V curves of C-PSCs based on the Cs-TiO<sub>2</sub> nanorods with various CsNO<sub>3</sub> solution concentration.

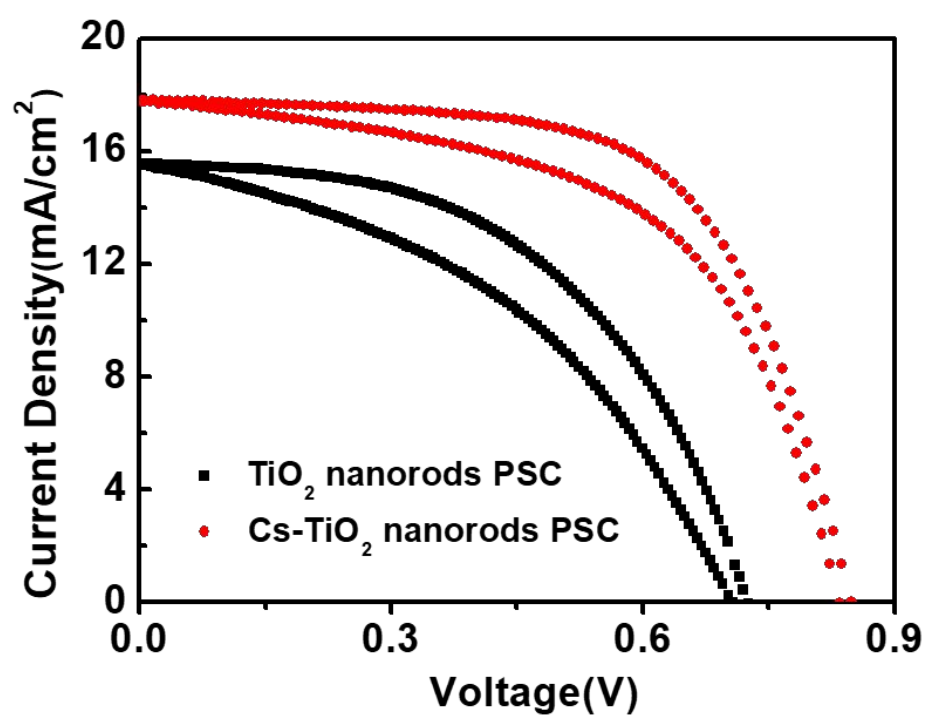

**Figure S5** J-V curves of the champion C-PSCs based on TiO<sub>2</sub> and Cs-TiO<sub>2</sub> nanorods measured in forward and reverse scanning modes.



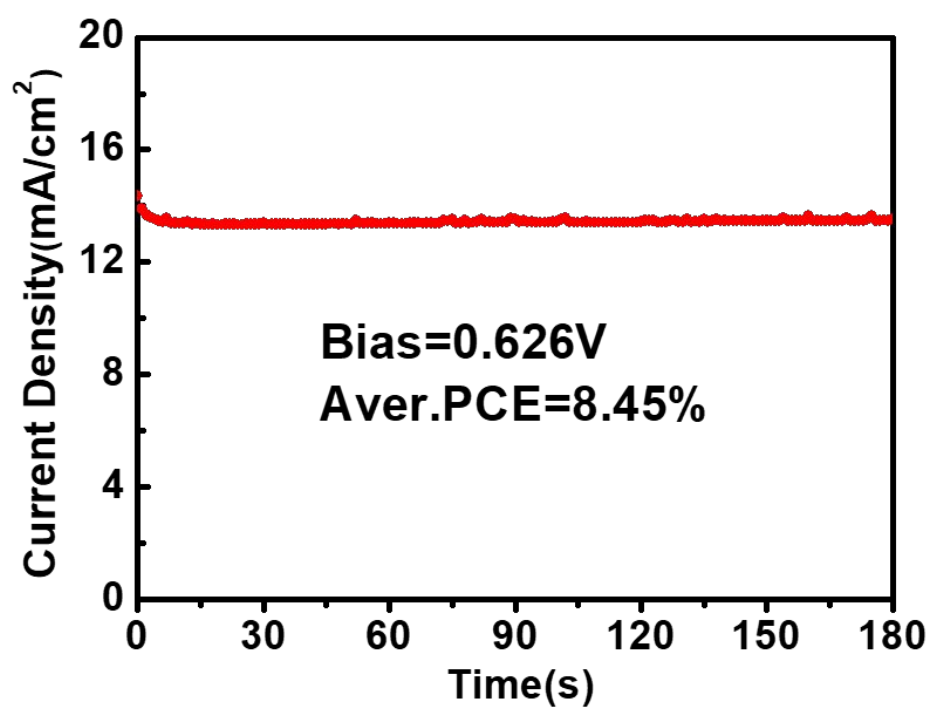

**Figure S6** Steady current density at a voltage close to the maximum output point of the champion Cs-TiO<sub>2</sub> C-PSCs.

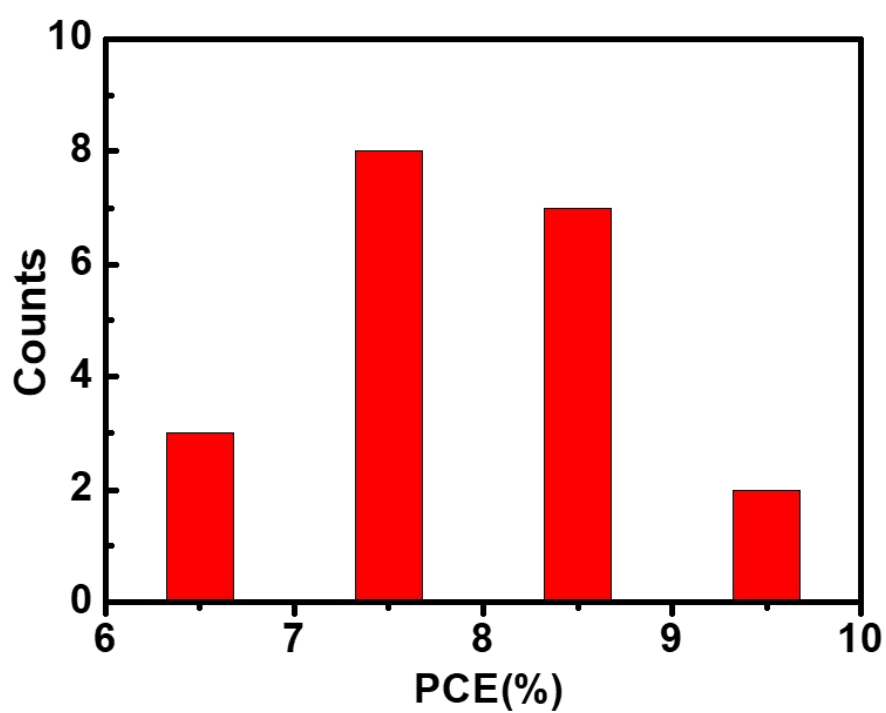

**Figure S7** PCEs histogram of 20 individual devices with the same fabrication procedure to that of the champion Cs-TiO<sub>2</sub> device.

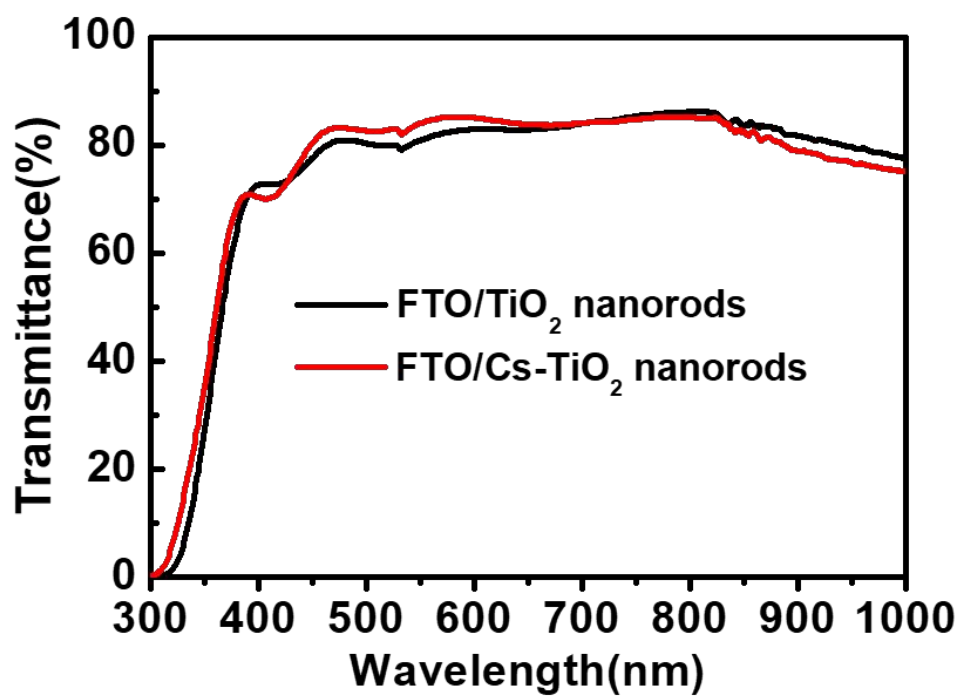

**Figure S8** Optical transmission spectra of TiO<sub>2</sub> and Cs-TiO<sub>2</sub> nanorods arrays.

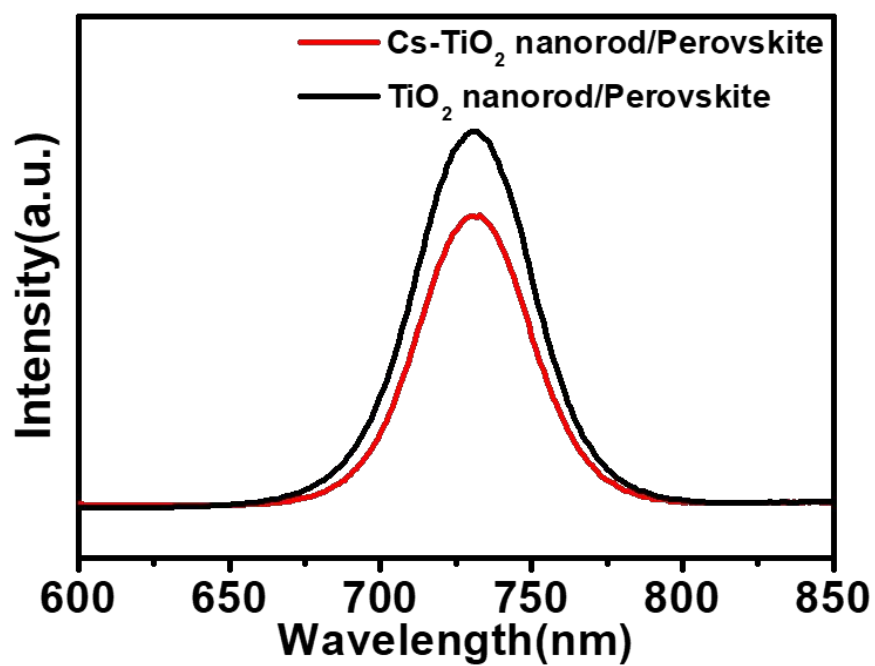

**Figure S9** Steady-state PL spectra of the CsPbI<sub>3</sub> films over the TiO<sub>2</sub> and Cs-TiO<sub>2</sub> nanorods.

**Table S1** Characteristics of C-PSCs based on the Cs-TiO<sub>2</sub> nanorods with various CsNO<sub>3</sub> solution concentrations.

|                     | <b>Jsc(mA/cm<sup>2</sup>)</b> | <b>Voc(V)</b> | <b>FF</b>   | <b>PCE(%)</b> |
|---------------------|-------------------------------|---------------|-------------|---------------|
| <b>1mg/ml-PSC</b>   | <b>16.2</b>                   | <b>0.76</b>   | <b>0.56</b> | <b>6.9</b>    |
| <b>2.5mg/ml-PSC</b> | <b>17.8</b>                   | <b>0.85</b>   | <b>0.63</b> | <b>9.5</b>    |
| <b>5mg/ml-PSC</b>   | <b>16.9</b>                   | <b>0.83</b>   | <b>0.60</b> | <b>8.4</b>    |
| <b>10mg/ml-PSC</b>  | <b>16.0</b>                   | <b>0.81</b>   | <b>0.58</b> | <b>7.5</b>    |

**Table S2** Photovoltaic parameters obtained from the champion C-PSCs based on TiO<sub>2</sub> and Cs-TiO<sub>2</sub> nanorods measured in forward and reverse scanning modes.

| <b>Devices</b>                  | <b>Scanning direction</b> | <b>Jsc (mA/cm<sup>2</sup>)</b> | <b>Voc (V)</b> | <b>FF (%)</b> | <b>PCE (%)</b> |
|---------------------------------|---------------------------|--------------------------------|----------------|---------------|----------------|
| <b>TiO<sub>2</sub> C-PSC</b>    | <b>Forward</b>            | <b>15.5</b>                    | <b>0.70</b>    | <b>43</b>     | <b>4.7</b>     |
|                                 | <b>Reverse</b>            | <b>15.5</b>                    | <b>0.72</b>    | <b>52</b>     | <b>5.8</b>     |
| <b>Cs-TiO<sub>2</sub> C-PSC</b> | <b>Forward</b>            | <b>17.8</b>                    | <b>0.84</b>    | <b>56</b>     | <b>8.3</b>     |
|                                 | <b>Reverse</b>            | <b>17.8</b>                    | <b>0.85</b>    | <b>63</b>     | <b>9.5</b>     |
